# Supplementary material
Source: MDPI journal article supplement (https://www.mdpi.com/2673-4591/37/1/114)
Supplement: s1 [file s1]

# Photocatalytic Degradation and Defluorination of Per- and poly-fluoroalkyl substance (PFAS) using Biosynthesized $\text{TiO}_2$ Nanoparticles under UV-visible Light

Saheed Mustapha, PhD ([saheedmustapha09@gmail.com](mailto:saheedmustapha09@gmail.com))  
Federal University of Technology, Minna, Nigeria

May, 2023

# INTRODUCTION

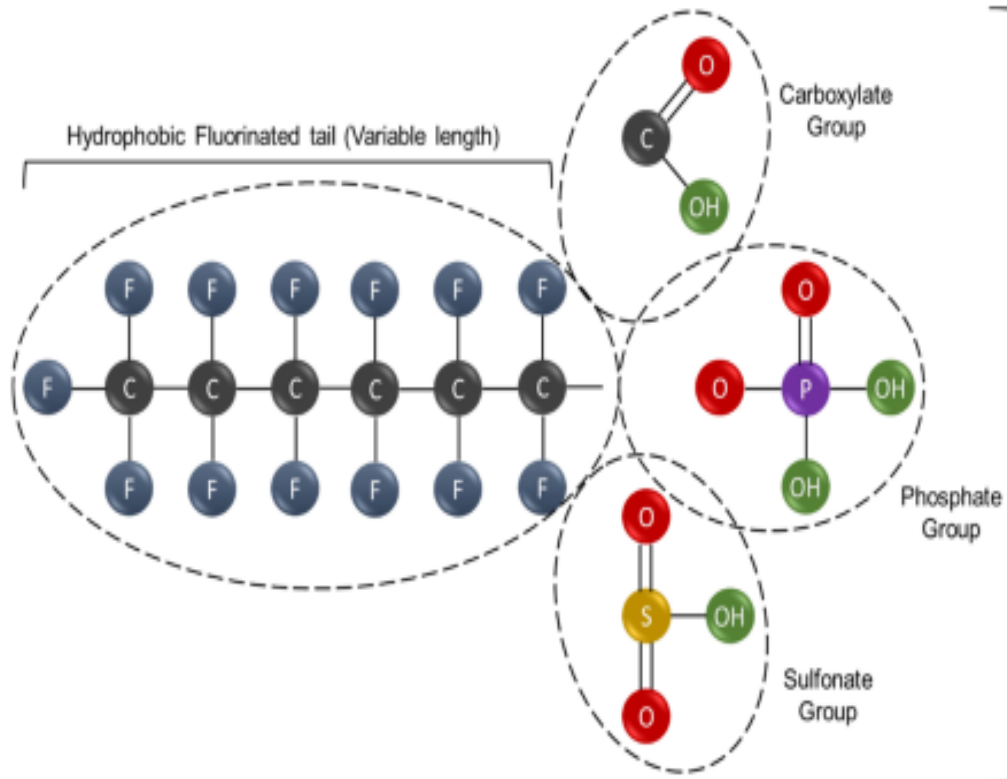

**Figure 1. Overview of the general structure of perfluorinated substances (PFAS)**

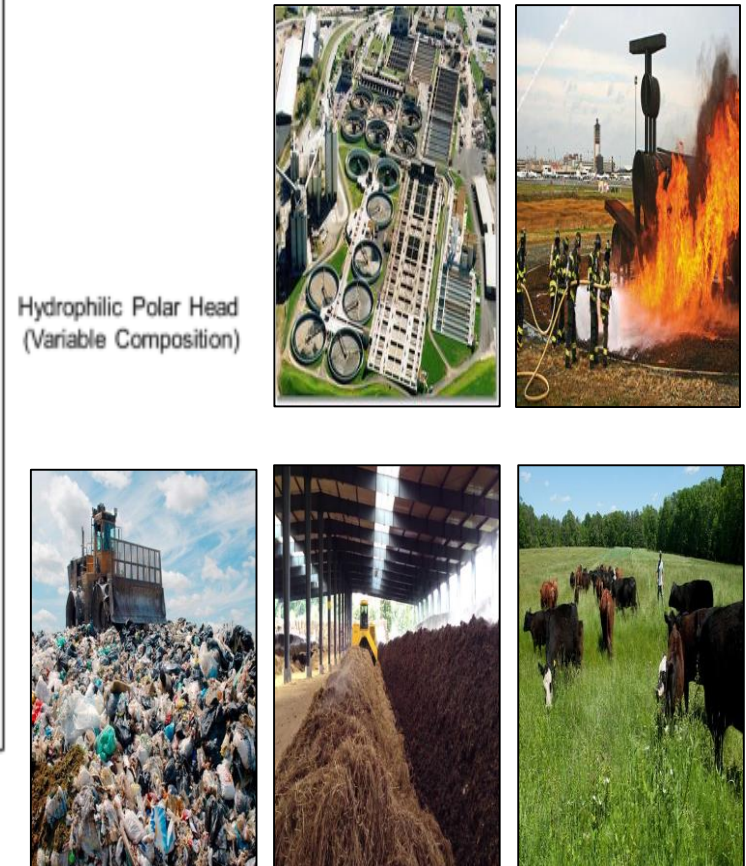

**Figure 2. Sources of PFAS environmental distribution**

### Global PFOS river discharge

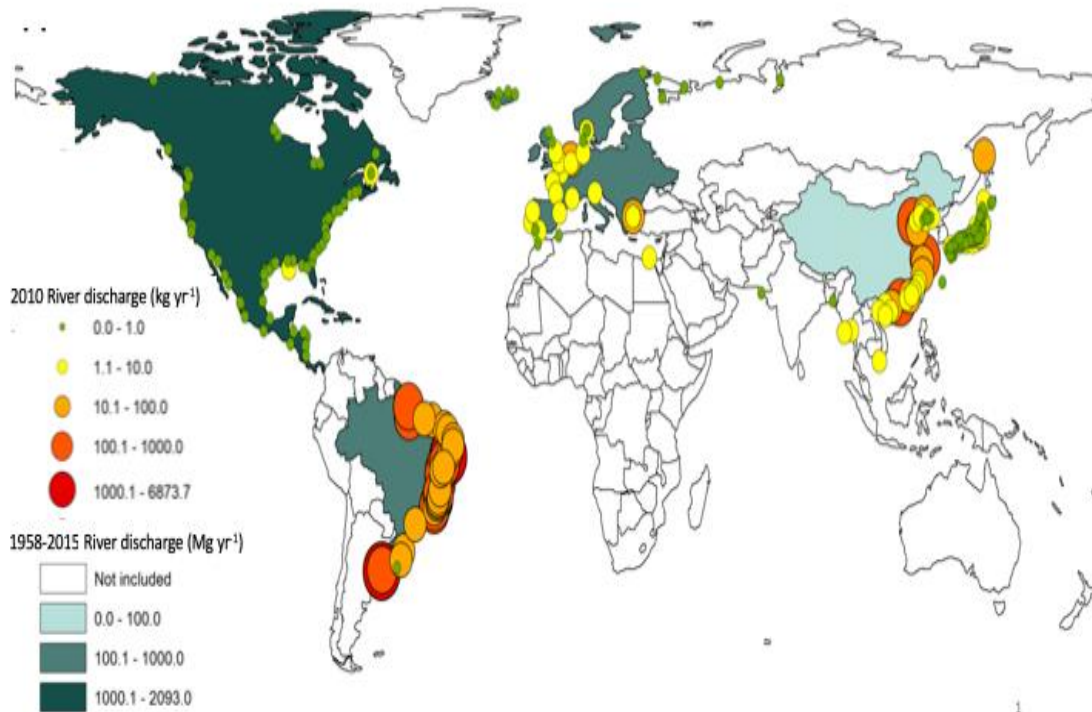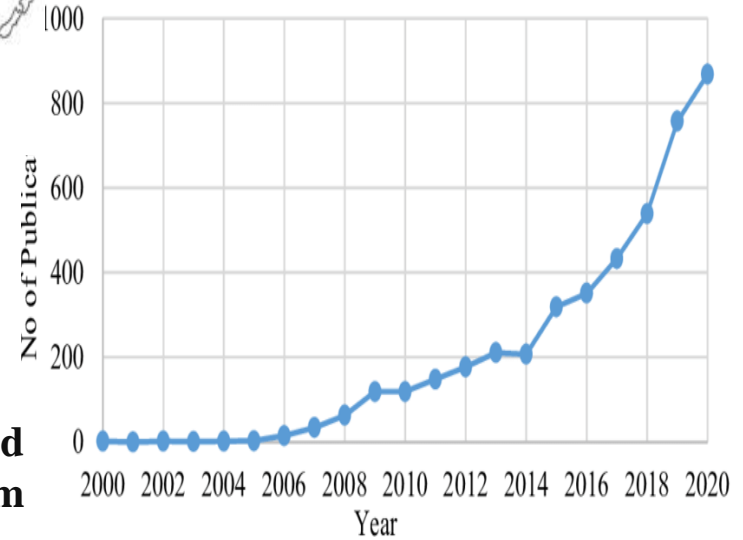

**Figure 3: Total number of documents published on PFAS from 2000 to 2020 (data extracted from Scopus; October 2020).**

## Some previous studies on PFAS removal

Verma et al. [3] conducted research to explore the effectiveness of UV-vis/ $Zn_xCu_{1-x}Fe_2O_4$ /oxalic acid in the breakdown of perfluorooctanoic acid (PFOA) in water. The reactive species generated from  $Zn_xCu_{1-x}Fe_2O_4$  photodegraded PFOA as a result of oxidation dissociation and defluorination.

The adsorption and solid-phase photodegradation of perfluorooctane sulphonate (PFOS) was investigated by Zhu et al. [4] using gallium-doped carbon-modified titanate nanotubes (Ga/TNTs@AC).

As a consequence of this, the  $TiO_2$  demonstrated significantly higher photocatalytic degradation efficiencies, and the photocatalysts may also enable photodegradation.

# RESULTS AND DISCUSSION

## *Characterization of TiO<sub>2</sub> nanoparticles*

Fig. 4 shows XRD patterns of TiO<sub>2</sub> nanoparticles at different pH. It can be seen that the synthesized samples at pH 8 to 12 showed the pure anatase phase of TiO<sub>2</sub>. The crystallite size of synthesized TiO<sub>2</sub> at pH 8 (14.91 nm), 12.01 nm at pH 10, and 9.15 nm at pH 12 were calculated using Debye Scherrer Equ. (1);

$$D = \frac{k\lambda}{\beta \cos\theta} \quad (1)$$

where k is the Scherrer constant (0.94),  $\lambda$  is the radiation wavelength (0.152 nm) of CuK $\alpha$ ,  $\beta$  is the full width at half maximum, and  $\theta$  is the Bragg angle of the orientation plane.

**Figure 4.** XRD patterns of biosynthesized TiO<sub>2</sub> nanoparticles at different pH values

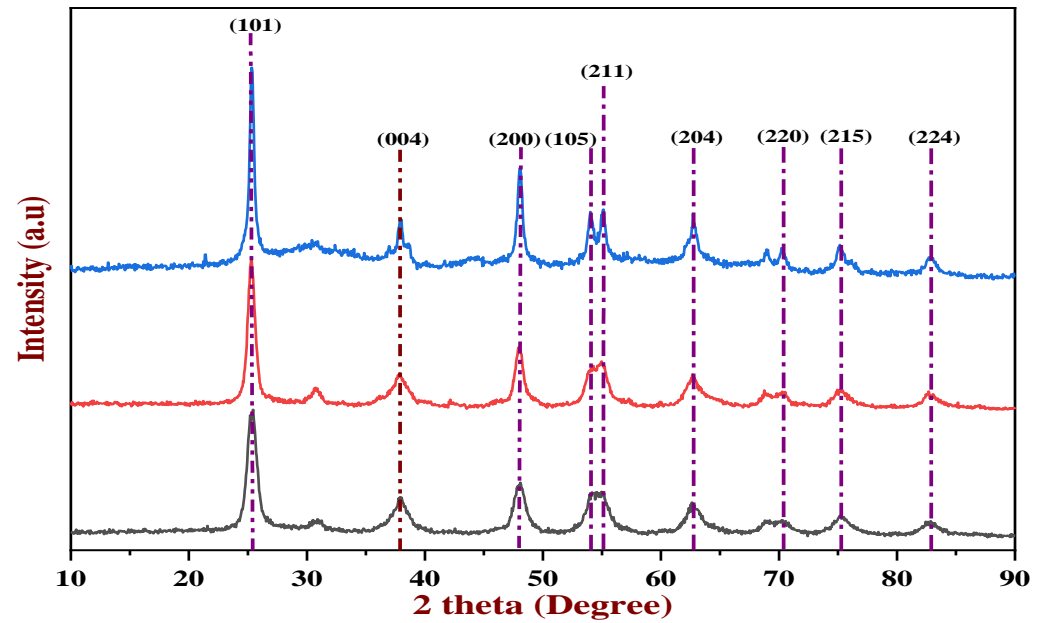

**Figure 5.** HRSEM image of biosynthesized TiO<sub>2</sub> nanoparticles at (a) pH 8 (b) pH 10 (c) 12

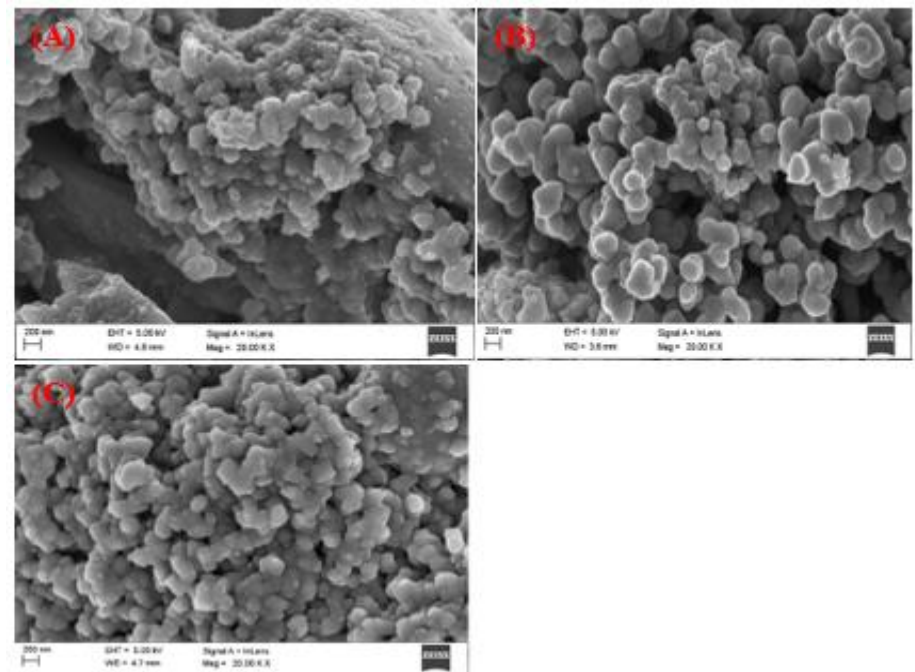

**Figure 6.** HRTEM image and size distribution of biosynthesized  $\text{TiO}_2$  nanoparticles at (a) pH 8 (b) pH 10 (c) pH 12

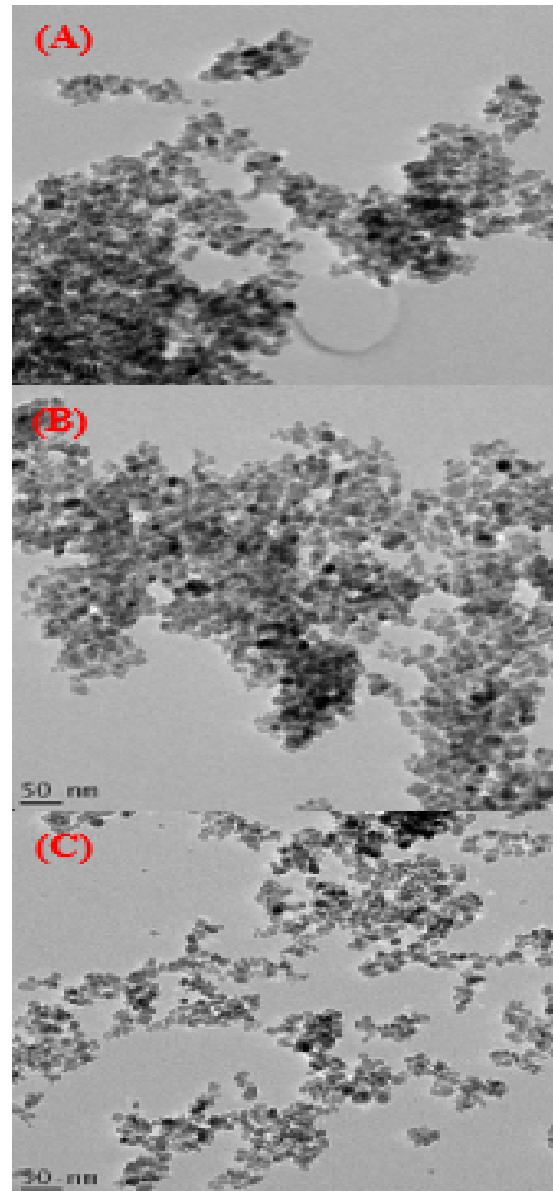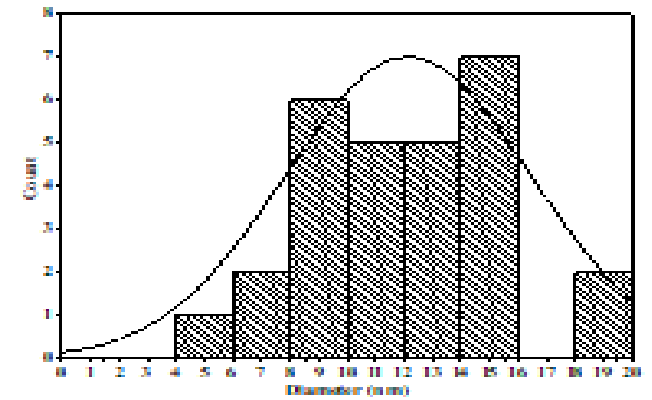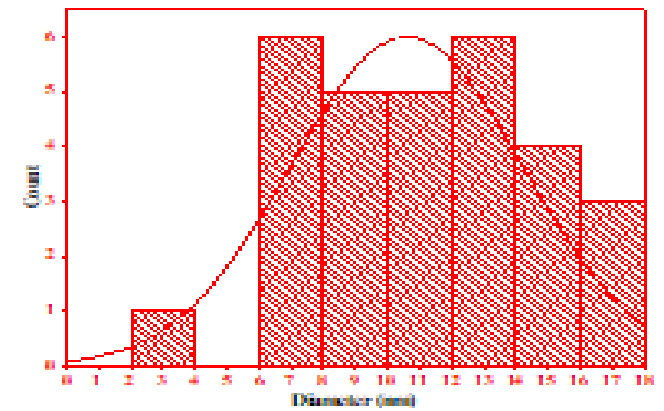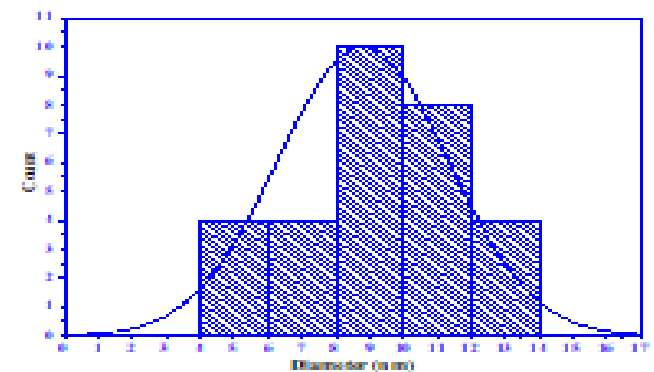

## *Photodegradation and defluorination of PFOS*

It was observed that as the pH increases the degradation and defluorination rates are reduced (Fig. 7). The variation in pH plays a key role in the distribution of radicals in the photocatalytic processes. The increase in the trend in PFOS with a decrease in pH solution could be attributed to the increase in the number of positive active sites on the nanoparticles at decreased pH values.

Figure 7. The effect of pH on the degradation and defluorination of PFOS

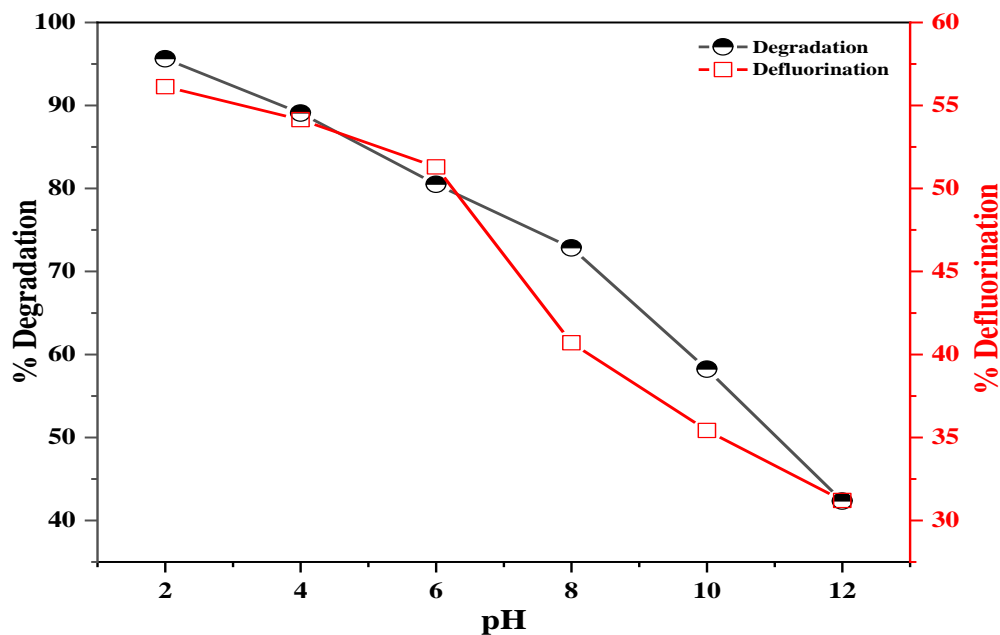



# Conclusion

In summary, biosynthesized  $\text{TiO}_2$  nanoparticles were used to demonstrate the photodegradation and defluorination of PFOS. The influence of basic pH media on the biosynthesis of the anatase phase of  $\text{TiO}_2$  was studied. The HRSEM and HRTEM results confirmed the spherical shapes of the synthesized nanoparticles. The biosynthesized  $\text{TiO}_2$  exhibited the highest degradation and defluorination at low pH of PFOS under UV irradiation. Thus, the findings unveil the potential of biosynthesized  $\text{TiO}_2$  nanoparticles as a photocatalytic material for the defluorination and degradation of PFOS in water.

**THANK YOU**

**FOR**

**LISTENING**
